# Supplementary material
Source: HighWire-hosted journal article supplement (https://bmjopen.bmj.com/content/6/4/e010697)
Supplement: inline-supplementary-material-1 [file inline-supplementary-material-1.pdf]

# **Assisted reproductive technology and risk of asthma and allergy in the offspring: protocol for a systematic review and meta-analysis**

Bright I Nwaru,<sup>1,2</sup> Nicola MCcleary,<sup>2</sup> Maijaliisa Erkkola,<sup>3</sup> Minna Kaila,<sup>4</sup> Suvi M Virtanen,<sup>1,5-7</sup> Aziz Sheikh<sup>2</sup>

<sup>1</sup>School of Health Sciences, University of Tampere, Tampere, Finland

<sup>2</sup>Asthma UK Centre for Applied Research, Centre for Medical Informatics, Usher Institute of Population Health Sciences and Informatics, The University of Edinburgh, Edinburgh, UK

<sup>3</sup>Department of Food and Environmental Sciences, University of Helsinki, Helsinki, Finland

<sup>4</sup>Department of Public Health, University of Helsinki, Helsinki, Finland

<sup>5</sup>Nutrition Unit, Department of Lifestyle and Participation, National Institute for Health and Welfare, Helsinki, Finland

<sup>6</sup>Tampere Centre for Child Health Research, Tampere University Hospital, Tampere, Finland

<sup>7</sup>Science Centre of Pirkanmaa Hospital District, Tampere University Hospital and University of Tampere, Finland

## **Supplementary File**

### **APPENDIX 1:**

#### **MEDLINE Search Strategy**

1. assisted reproductive technology.mp. or exp Reproductive Techniques, Assisted/
2. in-vitro fertilization.mp. or exp Fertilization in Vitro/
3. exp Insemination, Artificial/ or Insemination, Artificial, Homologous/ or intrauterine insemination.mp.
4. intracytoplasmic sperm injection.mp. or exp Sperm Injections, Intracytoplasmic/
5. exp Embryo Transfer/ or exp Zygote Intrafallopian Transfer/ or zygote intrafallopian transfer.mp.
6. gamete intrafallopian transfer.mp. or exp Gamete Intrafallopian Transfer/
7. infertility treatment.mp.
8. 1 or 2 or 3 or 4 or 5 or 6 or 7
9. exp Asthma/ or asthma.mp.
10. wheeze.mp.
11. exp Dermatitis, Atopic/ or atopic eczema.mp.
12. exp Hypersensitivity, Immediate/ or exp Hypersensitivity/ or atopy.mp. or allergy.mp. or atopic sensitisation.mp. or allergic sensitisation.mp.
13. exp Rhinitis, Allergic, Seasonal/ or exp Rhinitis, Allergic, Perennial/ or exp Allergens/ or allergic rhinitis.mp.
14. exp Conjunctivitis, Allergic/ or Rhinoconjunctivitis.mp.
15. exp Conjunctivitis, Allergic/ or Rhinoconjunctivitis.mp.
16. exp Urticaria/ or urticarial.mp.
17. exp Angioedema/ or angioedema.mp.
18. exp Food Hypersensitivity/ or food allergy.mp.
19. exp Anaphylaxis/ or anaphylaxis.mp.
20. lung function.mp.

21. airway function.mp. or exp Bronchial Hyperreactivity/
22. exp Forced Expiratory Volume/ or forced expiratory volume in 1 second.mp.
23. exp Peak Expiratory Flow Rate/ or peak expiratory flow.mp.
24. 9 or 10 or 11 or 12 or 13 or 14 or 15 or 16 or 17 or 18 or 19 or 20 or 21 or 22 or 23
25. 8 and 24
26. limit 25 to yr="1978-2016"
